# Supplementary material
Source: publisher figshare collection journal article supplement (https://acs.figshare.com/ndownloader/files/6204348)
Supplement: Supplementary file 1 [file 6204348]

# Supporting information for: Allosteric-Activation Mechanism Of Bovine Chymosin Revealed By Bias-Exchange Metadynamics and Molecular Dynamics Simulations

Samiul M. Ansari,<sup>†</sup> Andrea Coletta,<sup>‡</sup> Katrine Kirkeby Skeby,<sup>‡,¶</sup> Jesper Sørensen,<sup>‡,§</sup> Birgit Schiøtt,<sup>\*,‡</sup> and David S. Palmer<sup>\*,†</sup>

Department of Pure and Applied Chemistry, University of Strathclyde, Thomas Graham Building, 295 Cathedral Street, Glasgow, Scotland G1 1XL, UK, and Center for Insoluble Protein Structures (inSPIN), Interdisciplinary Nanoscience Center (iNANO), and Department of Chemistry, Aarhus University, Langelandsgade 140, DK-8000 Aarhus, Denmark

E-mail: birgit@chem.au.dk; david.palmer@strath.ac.uk  
Phone: +4587155975; +441415484178. Fax: +4586196199

## Tyr77 dihedral analysis

The  $\chi_{77}$  dihedral angle in Tyr77 as a function of simulation time is shown in Figure S1 (for the Amber ff03 simulation of the C3 complex). See the main article for further discussion.

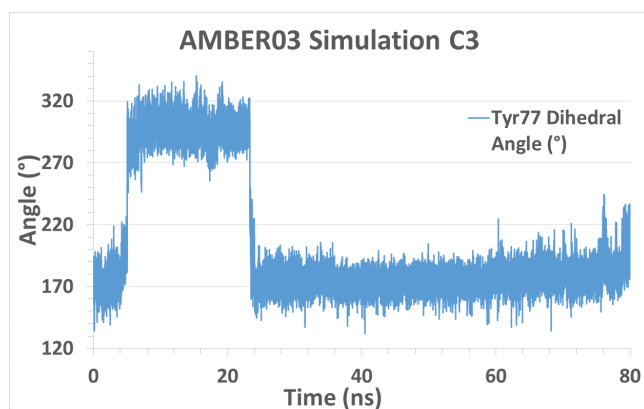

Figure S1: Tyr77 dihedral angle (blue) - AMBER03 Selfinhibited-HPHPH protonated complex (C3).

\*To whom correspondence should be addressed

<sup>†</sup>University of Strathclyde

<sup>‡</sup>University of Aarhus

<sup>¶</sup>Current Address: Digizyme Inc., Boston, MA, USA.

<sup>§</sup>Current Address: Dart NeuroScience LLC, 12278 Scripps Summit Dr, San Diego, CA 92131, United States

## Tyr77 and Phe114 interactions

### Apo-Chymosin

In the simulations of apo-chymosin, Tyr77 makes close contacts with two residues in the  $\alpha$ -helix, Val113 and Phe114. Phe114 extends towards the  $\beta$ -hairpin flap of chymosin when Tyr77 is in its self-inhibited state and extends away from the flap when Tyr77 is in its open conformation. In the *A1* simulation, in which Tyr77 is in the open conformation, contact with Phe114 occurs for 55% of the trajectory (using a distance of 4 Å between any non-hydrogen atoms to define a contact in the AMBER ff99SB-ILDN simulation). This increases to 94% in simulation *B1* where Tyr77 is in the self-inhibited conformation.

### Chymosin – P8-P4 $\kappa$ -Casein

In simulation *C1* using AMBER ff99SB-ILDN, Tyr77 remains in contact with the Phe114 in both its selfinhibited (73%) and open conformations (78%). There is an increase in atom-atom contacts between Tyr77.N:Phe114.CZ (15%  $\rightarrow$  36%) and Tyr77.H:Phe114.CE2 (6%  $\rightarrow$  11%) after the self-inhibited to open conformation. Phe114 makes

fewer contacts with Trp41 (which is located under the  $\beta$ -hairpin flap in the binding pocket) when Tyr77 is in its open conformation (37%  $\rightarrow$  17%).

In simulation *C2* using the AMBER03 force field, Tyr77 remains in contact with residue Phe114 in both the self-inhibited (67%) and open (74%) conformations. Close contacts are shown to increase for the same atoms as in the previous simulations when Tyr77 moves to its open state, Tyr77.N:Phe114.CZ (11%  $\rightarrow$  39%) and Tyr77.H:Phe114.CE2 (5%  $\rightarrow$  24%). Contact between Trp41 and Phe114 is also seen to decrease when Tyr77 is in its open state (66%  $\rightarrow$  32%).

Simulation *C3* using the AMBER03 force field contains a short 17ns period where Tyr77 changes to its open form before returning to the self-inhibited state. Residue contacts analysis reveals Tyr77 and Phe114 remains in contact in both the selfinhibited (84%) and open (80%) conformations. Atom contacts follow the same trend as seen in the simulations described above with an increase when Tyr77 is in its open conformation for Tyr77.N:Phe114.CZ (11%  $\rightarrow$  39%) and Tyr77.H:Phe114.CE2 (5%  $\rightarrow$  24%). However analysis of the residue contact between Trp41 and Phe114 reveal that there is an increase when Tyr77 is in its open conformation (selfinhibited-35%  $\rightarrow$  open-51%).

# Hydrogen-Bonding

Table S1: Percentage of total simulation time in which specific hydrogen bonds were observed in the Bias-Exchange Metadynamics simulations

| Donor  | Acceptor | Apo Enzyme |              |      | Holo Enzyme |              |      |
|--------|----------|------------|--------------|------|-------------|--------------|------|
|        |          | Closed     | Intermediate | Open | Closed      | Intermediate | Open |
| ASN10  | GLY161   | 63         | 57           | 94   | 1           | 2            | 2    |
| ASN10  | ASP158   | 9          | 17           | 96   | 66          | 26           | 53   |
| SER164 | ASN10    | 74         | 59           | 3    | 93          | 61           | 93   |
| SER220 | ASP13    | 48         | 54           | 93   | 0           | 0            | 0    |
| ARG304 | ASP13    | 37         | 33           | 95   | 68          | 18           | 50   |
| GLU118 | GLN15    | 97         | 97           | 73   | 0           | 4            | 13   |
| GLN15  | GLY218   | 0          | 0            | 0    | 74          | 63           | 70   |
| TYR16  | TYR156   | 64         | 82           | 92   | 0           | 0            | 0    |
